# Supplementary material for: Exploring the Anti-Cancer Effects of Fish Bone Fermented Using Monascus purpureus: Induction of Apoptosis and Autophagy in Human Colorectal Cancer Cells
Source: MDPI journal article supplement (doi:10.3390/molecules28155679), 2023-07-27
Supplement: s1 [file s1]

(A) Control

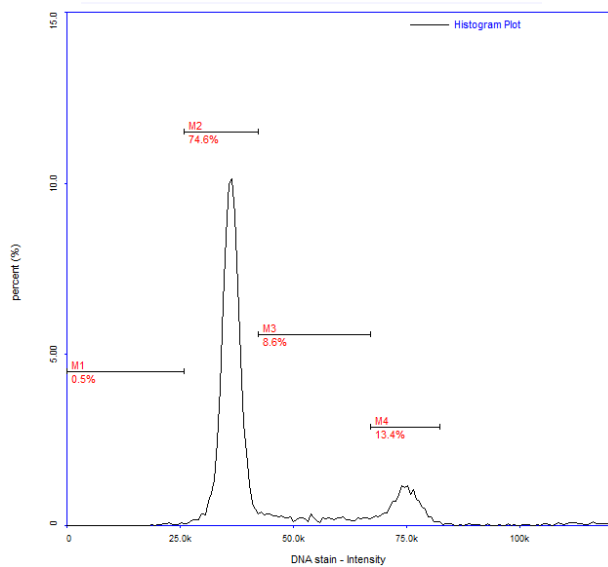

(B) F3-1 mg/mL

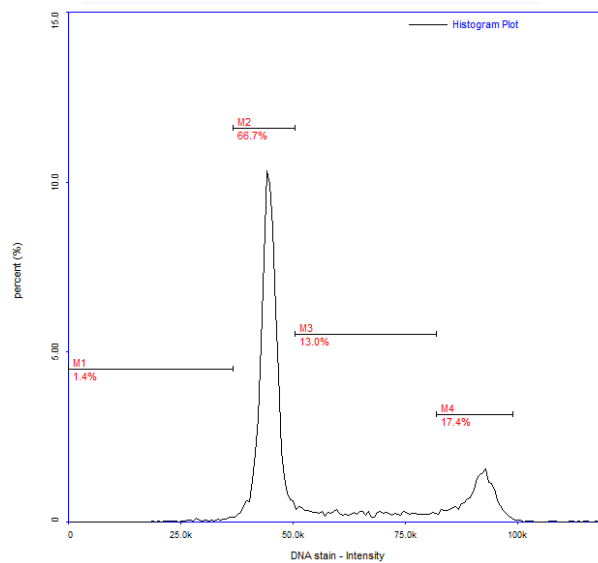

(C) 2.5 mg/mL

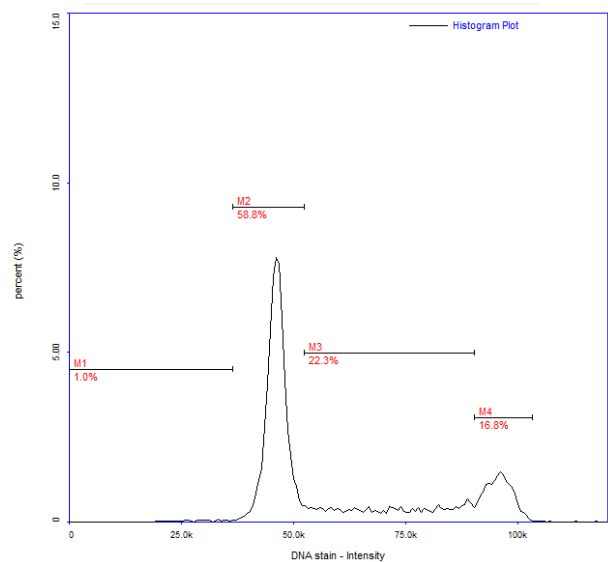

(D) F3-5 mg/mL

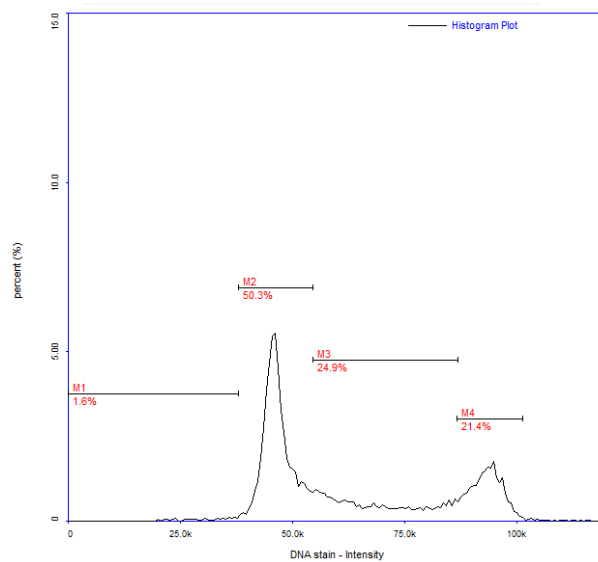

**Supplementary Figure S1.** Effect of F3 on representative images of cell cycle analysis in HCT-116 cells. Data are expressed the mean  $\pm$  SD (n = 5). FB: Fish bone; MP: *Monascus purpureus*; FBF: fish bone fermented with *Monascus purpureus* for 3 days.
